# Supplementary material for: Greater epithelial ridge cells are the principal organoid-forming progenitors of the mouse cochlea
Source: PubMed Central journal article supplement — Cell Rep. Author manuscript; Available in PMC 2021 Jan 30. (PMC7847202; doi:10.1016/j.celrep.2020.108646), 2021-01-19

**Supplementary Table S3 Violin Plots for the Top Differentially Expressed Genes in S1-S11. Related to Figure 3.** Shown are violin plots for the top 10 genes with the highest  $\log_2$ -fold expression difference for CellTrails clusters S1-S11. Green lines indicate the average gene expression in each cluster.

### S1

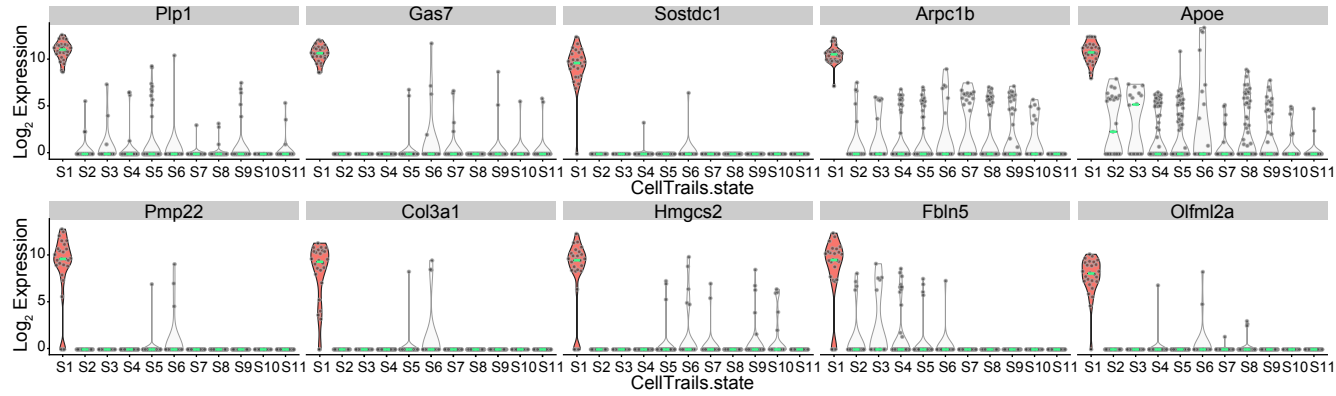

### S2

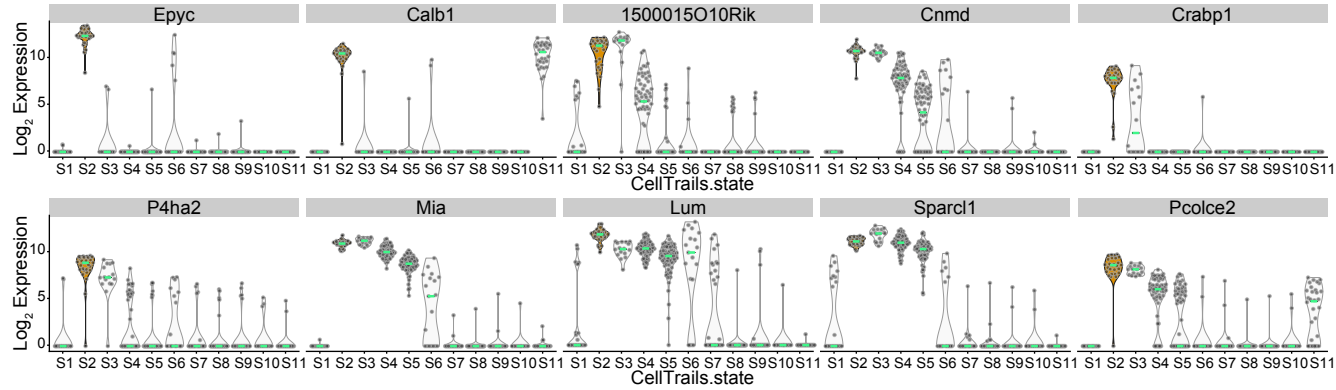

### S3

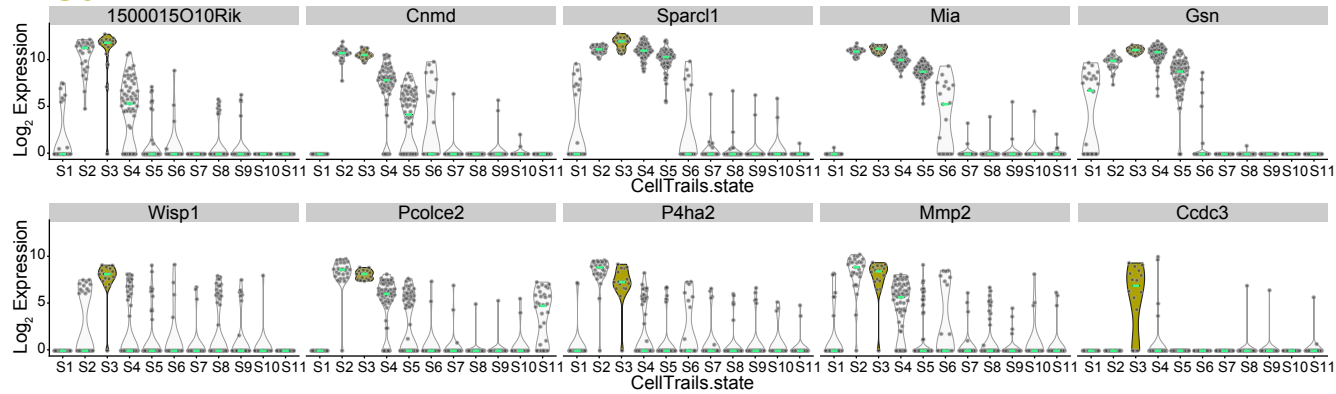

### S4

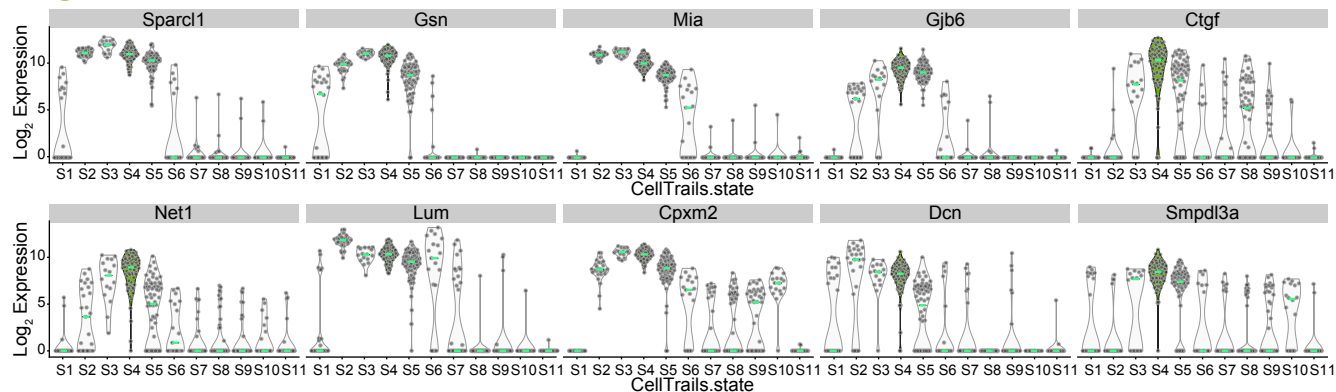

## S5

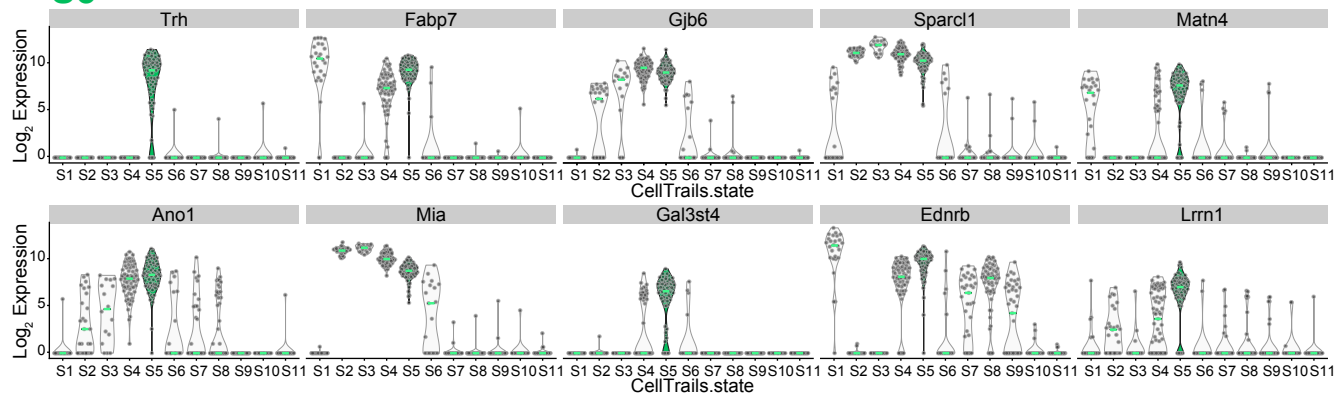

## S6

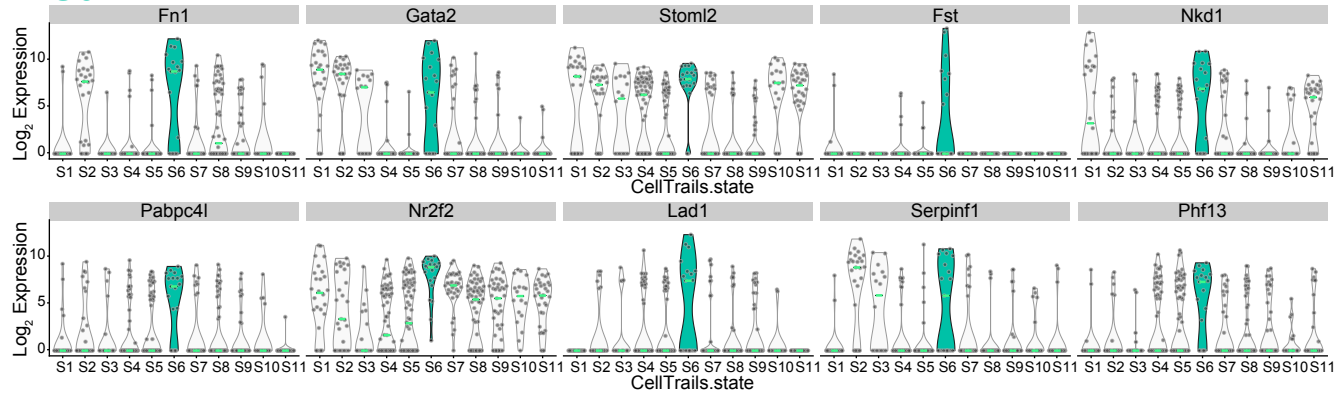

## S7

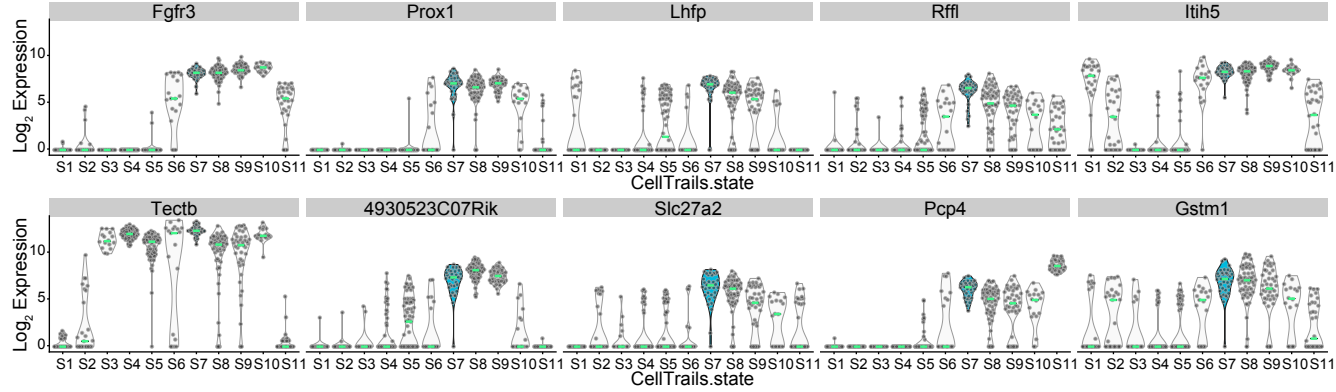

## S8

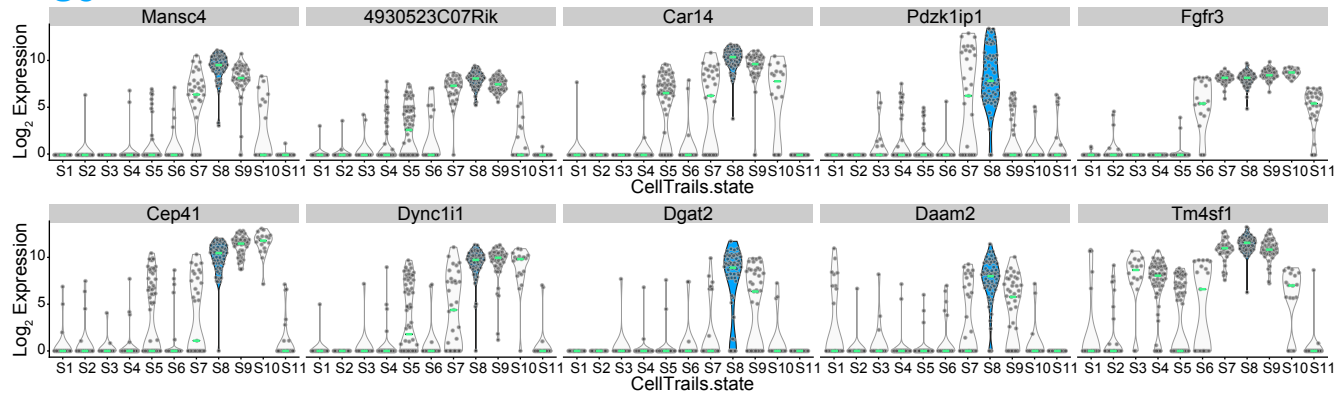



**S9**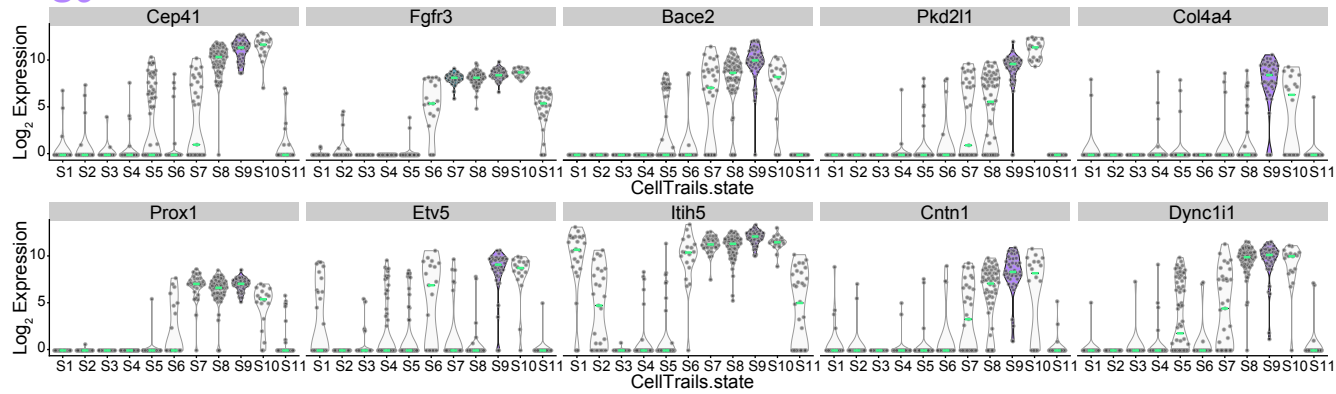**S10**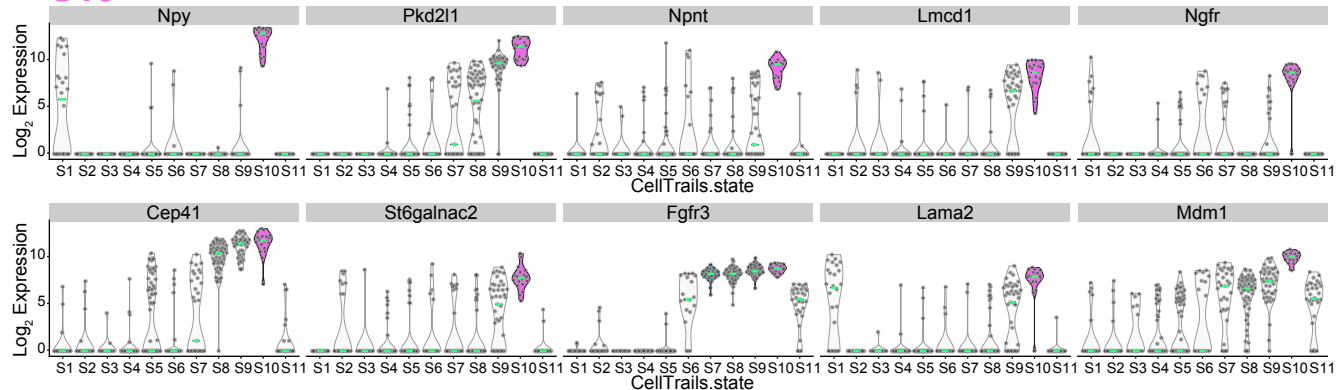**S11**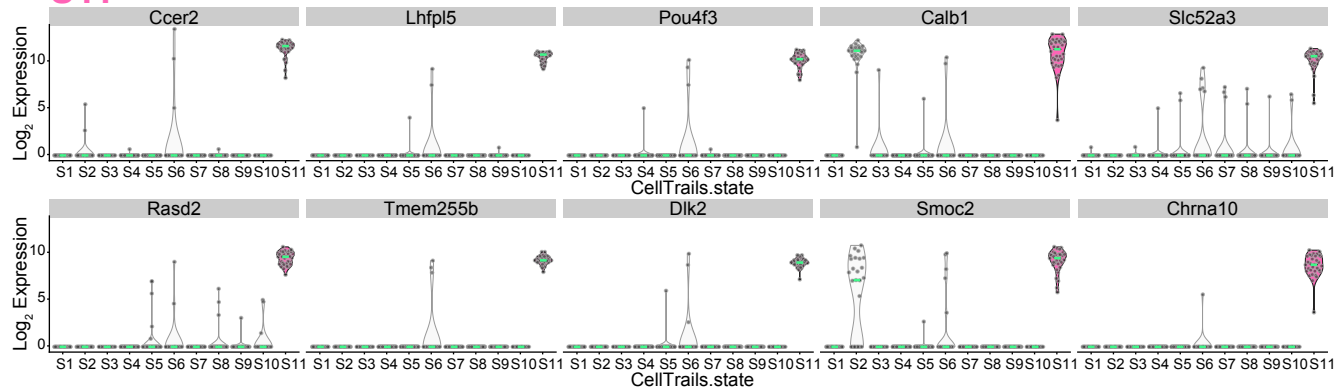

Supplement: NIHMS1664961-supplement-4.pdf [file NIHMS1664961-supplement-4.pdf]
